1           **“A Man Never Cries”: A Mixed-Methods Analysis of Gender Differences in**  
2                                   **Depression and Alcohol Use in Moshi, Tanzania**

3   **Authors and affiliations:**

4   Alena Pauley MScGH<sup>1</sup> – [alena.pauley@duke.edu](mailto:alena.pauley@duke.edu)

5   Mia Buono<sup>1</sup> – [mia.buono@duke.edu](mailto:mia.buono@duke.edu)

6   Madeline Metcalf<sup>1</sup> – [madeline.metcalf@duke.edu](mailto:madeline.metcalf@duke.edu)

7   Kirstin West<sup>1</sup> - [kirstin.west@duke.edu](mailto:kirstin.west@duke.edu)

8   Sharla Rent MD MScGH<sup>1,2</sup> - [Sharla.Rent@duke.edu](mailto:Sharla.Rent@duke.edu)

9   William Nkenguye<sup>3</sup> – [williamnkenguye@gmail.com](mailto:williamnkenguye@gmail.com)

10   Yvonne Sawe<sup>4</sup> – [yvonneseawe90@gmail.com](mailto:yvonneseawe90@gmail.com)

11   Mariana Mikindo<sup>4</sup> – [mirianamikindo@gmail.com](mailto:mirianamikindo@gmail.com)

12   Joseph Kilasara APRN MNS-FNP<sup>4,5</sup> – [joseph.kilasara@kcmuco.ac.tz](mailto:joseph.kilasara@kcmuco.ac.tz)

13   Judith Boshe MD MMED<sup>4,6</sup> – [jboshe@live.com](mailto:jboshe@live.com)

14   Brandon A. Knettel, MD<sup>1,7</sup> – [brandon.knettel@duke.edu](mailto:brandon.knettel@duke.edu)

15   Blandina T. Mmbaga, MD PhD<sup>1,4,6</sup> – [blaymt@gmail.com](mailto:blaymt@gmail.com)

16   Catherine A. Staton, MD MScGH<sup>1,8</sup> – [catherine.lynch@duke.edu](mailto:catherine.lynch@duke.edu)

17

18   1 Duke Global Health Institute, Duke University, Durham, NC, USA

19   2 Duke Department of Pediatrics, Duke University Medical Center, Durham, NC, USA

20   3 Kilimanjaro Christian Medical University College, Moshi, Tanzania

21   4 Kilimanjaro Clinical Research Institute, Moshi, Tanzania

22   5 Department of Clinical Nursing, Kilimanjaro Christian Medical University College, Moshi,

23   Tanzania

24   6 Kilimanjaro Christian Medical Center, Moshi, Tanzania

25 7 Duke University School of Nursing, Durham, NC, USA

26 8 Duke Department of Surgery, Duke University Medical Center, Durham, NC, USA

27 Corresponding Author in event of publication: [catherine.lynch@duke.edu](mailto:catherine.lynch@duke.edu) (CAS)

28 ORCID#: 0000-0002-6468-2894

29

30 *Funding:* This project was funded by the Duke Global Health Institute Graduate Student funds  
31 (AMP), and the Josiah Trent Foundation (21-06 to CAS). These two financial awards funded the  
32 salaries of JK, YS, and MMi as research assistants hired specifically for this study. No other  
33 authors received specific funding for this work. Infrastructure built by NIH grants (R01  
34 AA027512 and D43TW012205 to CAS) was used to support the data collection and analysis  
35 processed for this grant to understand gender-related aspects of alcohol use at KCMC. The  
36 funders had no role in study design, data collection and analysis, decision to publish, or  
37 preparation of the manuscript.

38 *Competing interests:* The authors declare no competing interests

39 **Author contributions:**

40 Conceptualization: AP, CAS, BTM, JB

41 Methodology: AP, CAS, KW

42 Formal analysis and investigation: CAS, BTM, JB

43 Data Collection: JK, YS, MMi, AP

44 Writing - original draft preparation: AP, MB, MM, KW, WN

45 Writing - review and editing: AP, SR, BAK, CAS

46 Funding acquisition: AP, CAS

47 Supervision: CAS, BTM, SR

## 48 Abstract

49 **Background:** Unhealthy alcohol use negatively impacts many components of health and  
50 wellness, including mental health conditions like major depressive disorder (MDD). Globally,  
51 gender differences are common for both alcohol use behaviors and MDD, but these differences  
52 have not been studied within Moshi, Tanzania. To provide more effective and culturally  
53 appropriate mental health treatments, gender nuances around these conditions must be known.  
54 As such, this study aims to explore gender differences in MDD, alcohol use, and other aspects of  
55 mental well-being among patients at Kilimanjaro Christian Medical Center (KCMC) in Moshi.  
56 **Methods:** Six hundred and seventy-six patients presenting for care at the KCMC Emergency  
57 Department (ED) and Reproductive Health Centre (RHC) were enrolled in this mixed-methods  
58 study between October 2021 and May 2022. Patients were selected through systematic random  
59 sampling and completed quantitative surveys including the Alcohol Use Disorder Identification  
60 Test (AUDIT) and the Patient Health Questionnaire 9 (PHQ-9). Nineteen patients were  
61 purposively chosen from the study population to participate in in-depth interviews (IDIs)  
62 exploring topics related to alcohol use, gender, and depression. Descriptive frequencies,  
63 univariate log-binomial regressions, and a linear regression model were used to analyze  
64 quantitative data, all of which were analyzed in RStudio. A grounded theory approach was used  
65 to analyze all IDIs in NVivo. **Results:** Average [SD] PHQ-9 scores were 7.22 [5.07] for ED  
66 women, 4.91 [4.11] for RHC women, and 3.75 [4.38] among ED men. Similarly, ED women  
67 held the highest prevalence of MDD (25%) as compared to RHC women (11%) and ED men  
68 (7.9%) ( $p < 0.001$ ). Depressive symptoms were associated with higher AUDIT scores only for ED  
69 men ( $R^2 = 0.11$ ,  $p < 0.001$ ). Our qualitative analysis showed that while present for women, social  
70 support networks were notably absent for men in Moshi, the lack of which was seen to play a

71 role in alcohol use. For men, alcohol was described as a coping mechanism for stress.  
72 **Conclusion:** Intersectionality of gender, alcohol use, and depression is influenced by  
73 sociocultural and behavioral norms in Moshi. As such, multi-layered, gender-differentiated  
74 programming should be considered for the treatment of substance use and mental health  
75 conditions in this region.

## 76 Introduction

77 Alcohol is a significant contributor to the global burden of disease, having been directly  
78 linked to the onset of diabetes, certain cancers, sexually transmitted infections, cardiovascular  
79 and gastrointestinal diseases, as well as injuries and violence (1–3). Another key but often  
80 understudied contributor to the alcohol-related burden of disease is its impact on mental health.  
81 Worldwide, over 95 million people have been diagnosed with alcohol use disorder (AUD), a  
82 highly disabling condition characterized by harmful drinking and the inability to stop or control  
83 one’s drinking habits (4–6). Depression is the most common mental health disorder to co-occur  
84 with AUD (7–11), and both depression and AUD commonly co-occur with other mental health  
85 conditions, such as other substance abuse disorders, anxiety, dementia, and psychosis-related  
86 disorders. One-third of individuals diagnosed with AUD meet the criteria for major depressive  
87 disorder (MDD), and studies have shown that those with an AUD diagnosis have a 3.7 times  
88 greater risk of acquiring MDD (8,12,13). On its own, depression is the leading cause of disability  
89 globally, and when AUD and MDD co-occur, the severity of depression is greater than when it  
90 occurs alone (9,12,14–16).

91 Mental health and AUD are poorly studied in many low- and middle-income countries  
92 (LMICs), with few resources and trained personnel available to treat disorders that arise within  
93 the general population (17–19). This healthcare gap is especially concerning given that alcohol  
94 use and AUD are rising in LMICs (12,20–22). For example, there are only 55 psychologists and  
95 psychiatrists in Tanzania, a nation of more than 63 million people (23). Tanzania, which is  
96 situated on the Eastern coast of the African continent, has especially high rates of alcohol use  
97 and AUD (24). Though the prevalence of AUD is 5.1% globally and 3.7% within the World  
98 Health Organization’s (WHO) Africa region, 6.8% of Tanzanians tested positive for AUD, and

99 20% partook in heavy episodic drinking (24,25). In Moshi, a suburban town in Northern  
100 Tanzania, increasing and unhealthy alcohol use is especially concerning given its availability,  
101 low cost, local practices that normalize intake from a young age, and common integration of  
102 alcohol into sociocultural practices (26–29).

103 Gender is another important variable that can influence the presentation and rate of onset  
104 of both AUD and MDD, as well as alcohol use behaviors. Worldwide, men tend to drink larger  
105 quantities of alcohol, but women have higher rates of depression. In 2016, for example, the  
106 worldwide average annual alcohol intake was 19.4 liters for men and 7.0 liters for women (24).  
107 Greater alcohol use among men is likewise seen in Tanzania, where men are 5 times more likely  
108 to have AUD than women (24).

109 Conversely, 3.0% of women but 1.8% of men worldwide had MDD, with women also  
110 experiencing a greater proportion of depression-related disability (30). When adjusting for age,  
111 women had a disability-adjusted life year (DALY) rate of 564 compared to 354 for men,  
112 meaning globally, women lost 210 more years of healthy life from depression-related disability  
113 or premature death than men (31).

114 Within Moshi, gender has also been shown to impact alcohol use behaviors, with a  
115 greater societal stigma against women’s drinking, leading to decreased intake but also more  
116 secretive use behaviors among those who do drink alcohol (32,33). This stigma and the resulting  
117 tendency toward private drinking have important consequences, negatively affecting women’s  
118 ability to access appropriate alcohol-related treatment and care services. Stress has been  
119 identified as a significant contributor to drinking for both genders in Moshi, with relationship  
120 stress for women and financial stress for men facilitating increased alcohol consumption (32).

121           The prevalence of depression has been well-studied among specific patient groups in  
122 Moshi, including older adults (34), pregnant women (35), and people living with HIV (36). Data  
123 on depression rates among other populations in Moshi, though, is scarce, and the interplay of  
124 depression with AUD and the effects of gender in this context are even less well-studied. Since  
125 gender may be a key driver of AUD and mental health disorders, a better understanding of the  
126 role gender plays in these health conditions could help inform and design more effective  
127 treatment options, guide local health policy, and improve long-term patient outcomes in this  
128 setting. This paper aims to help advance these long-term goals and build upon previous work in  
129 this region that has examined depression rates among specific patient populations (35,37,38),  
130 estimated rates of alcohol use and AUD (26,39), and explored gender differences in alcohol use  
131 in Moshi (33,40). Our paper aims to (1) quantitatively compare gender differences in rates of  
132 MDD, (2) qualitatively explore the relationship between alcohol use and mental well-being, and  
133 (3) assess how this relationship varies according to gender among Emergency Department (ED)  
134 and Reproductive Health Center (RHC) patients at the Kilimanjaro Christian Medical Center  
135 (KCMC).

## 136 Methods

### 137 *Study Design Overview*

138           Between October 2021 and May 2022, mixed-methods data were collected to explore  
139 gender differences in alcohol consumption in Moshi, Tanzania, an urban town of over 200,000  
140 residents. Data were collected at the Kilimanjaro Christian Medical Center (KCMC), a large  
141 referral hospital in the region that provides care to over 1.9 million people (41). Data consisted of  
142 quantitative surveys and qualitative in-depth interviews (IDIs) with patients at KCMC's  
143 Emergency Department (ED) and Reproductive Health Center (RHC). These two sites were  
144 chosen to better understand harmful alcohol use behaviors in the ED and to provide a primarily  
145 female perspective from the RHC.

146           During the study period, 676 patients met inclusion criteria and were enrolled through a  
147 systematic random sampling strategy to ensure an unbiased representation of each patient  
148 population. Of those enrolled, 21 participants had incomplete surveys and were excluded from  
149 the quantitative analysis. The remaining 655 survey reports were used to determine the  
150 prevalence of MDD by gender and the association between MDD and AUD. Out of these  
151 enrolled patients, 19 were selected to participate in IDIs via purposive sampling. This qualitative  
152 component allowed for a deeper exploration of how gender impacts the overall relationship  
153 between mental health and risky alcohol use behaviors.

### 154 *Exclusion Criteria*

155           All study participants were recruited from KCMC's RHC or ED. Participants were  
156 excluded from the study if they were under 18 years of age, prisoners, not fluent in Kiswahili, or  
157 unable to provide informed consent. In addition, if the patient was not clinically sober, medically



158 stabilized, or not well enough to complete the survey verbally on their own, they were excluded  
159 from the study.

## 160 *Quantitative Data*

### 161 *Procedures*

162 All subjects were enrolled through a systematic random sampling strategy. Using ED and  
163 RHC intake triage registries, every third patient presenting for care was approached for study  
164 participation, with the exception of ED women. Every ED women patient was approached as  
165 KCMC’s ED sees significantly more male patients than females. Tanzanian, Kiswahili-speaking  
166 research assistants provided a study overview to same-gendered patients in quiet, private clinic  
167 spaces once a patient had been medically stabilized and was clinically sober. If the patient was  
168 interested in participating, a thorough discussion of the study, including potential risks and  
169 benefits, ensued. Individuals were free to ask questions or decline participation. If the patient  
170 was willing to participate in the study, written consent was obtained, and survey questions were  
171 read orally. Responses were recorded by the research assistant to encourage participation from  
172 all literacy levels.

### 173 *Instruments*

174 The Patient Health Questionnaire 9 (PHQ-9) was used to quantitatively assess depressive  
175 symptoms and estimate the prevalence of MDD among study participants. This survey tool,  
176 which is used globally as a clinical marker for depression, has been translated and clinically  
177 validated in Tanzania in the local language of Kiswahili (42–45). The PHQ-9 is composed of 9  
178 questions related to depressive symptoms, such as having poor appetite, poor sleep regulation, or  
179 thoughts of self-harm, with responses tallied on a Likert-type scale ranging from 0, “not at all,”  
180 to 3, “nearly every day” over the previous two weeks. Scores thus range from 0 to 27, with

181 higher scores indicating more severe depressive symptoms. Previous studies using the Kiswahili  
182 version of the PHQ-9 have determined 9 to be the optimal cut-off point for identifying a major  
183 depressive episode, meaning a patient has experienced five or more depressive symptoms for at  
184 least a two-week period (42,46). As such, scores of 9 or greater were of primary interest in this  
185 analysis to assess the prevalence of likely depression.

186 The Alcohol Use Disorder Identification Test (AUDIT) measures overall alcohol  
187 consumption and assesses for unhealthy alcohol use behaviors. AUDIT scores range from 0 to  
188 40, with higher scores representing increasingly unsafe use. This survey tool was designed to  
189 flag patients who display signs of Harmful or Hazardous Drinking (HHD) (47–49). HHD is  
190 defined as drinking habits that place a person at risk for experiencing negative health outcomes  
191 from their drinking. HHD is measured through AUDIT as scores greater than or equal to 8 (47–  
192 50). AUDIT has been translated and cross-culturally validated at KCMC with a similar study  
193 population (49).

#### 194 *Analysis*

195 We quantitatively assessed the prevalence of MDD and HHD among ED male, ED  
196 female, and RHC female patients. PHQ-9 and AUDIT scores are presented as means with  
197 standard deviations, except when dichotomized according to the recommended cut-off points to  
198 assess depression and HHD. For PHQ-9, scores of 8 or less were labeled as ‘no MDD,’ and  
199 scores of 9 or more were characterized as ‘MDD.’ Similarly, for AUDIT, scores of 7 or less  
200 were labeled as ‘no HHD,’ and scores of 8 or more were characterized as ‘HHD.’ When  
201 dichotomized, HHD and MDD are presented as descriptive proportions.

202 The relationship between PHQ-9 and AUDIT scores was also assessed through a linear  
203 regression model, with PHQ-9 scores standing as the dependent variable and AUDIT scores as

204 the independent variable, and through a univariate log-binomial regression. The latter was used  
205 to test unadjusted associations between binary predictors of MDD and the binary outcome  
206 variable (e.g., MDD status), with relative risks (RRs) as the measure of association. Binary  
207 predictors of MDD status that were tested included male gender, different clinical groups, HHD  
208 status, and whether treatment was sought for alcohol use and/or psychiatric reasons. Wald  
209 confidence intervals, using log-based methods, were used to calculate 95% confidence intervals  
210 for reported relative risks.

211 Quantitative data were measured across all three patient groups instead of by gender  
212 alone to illustrate differences in MDD burden between the two clinical sites. Further, since the  
213 ED and RHC have distinct patients presenting for care, a delineation in scores more accurately  
214 described both populations. All quantitative data were analyzed in RStudio (version 1.4) using  
215 user-tested packages.

## 216 *Qualitative Data*

### 217 *Sampling*

218 Out of the 676 enrolled participants, 19 were selected via purposive sampling to  
219 participate in IDIs. Reviews of qualitative work have demonstrated that interviewing 20  
220 participants is sufficient for research study saturation when study aims are narrow (51). To  
221 obtain a gender-balanced perspective, the team aimed to interview five female ED patients, five  
222 female RHC patients, and ten male ED patients, or cease once saturation was reached. Saturation  
223 in the study was defined as the lack of new themes or information after three consecutive  
224 interviews and was reached only for ED males after nine participants were interviewed. At this  
225 point, qualitative data collection was terminated, leaving 19 IDIs collected in total.

226 Purposive sampling was used to ensure a diverse demographic background and alcohol  
227 use experiences among selected participants. This included selecting participants from differing  
228 ages, religions, income groups, professions, and marital statuses and encompassing patients who  
229 held a diverse range of alcohol use behaviors, from complete abstinence to heavy use. Research  
230 Assistants also worked to incorporate those with notable personal experiences with alcohol, such  
231 as those who used to drink heavily but quit or have had a close friend or relative drink  
232 excessively. To maintain unbiased selection, interviewee characteristics were reviewed monthly  
233 by the study lead, and recruitment was revised accordingly.

#### 234 *Procedures*

235 Selected participants were approached to participate in an IDI after the conclusion of the  
236 quantitative survey or through a subsequent phone call. Due to the potentially stigmatizing nature  
237 of the study topic, emphasis was placed on maintaining confidentiality for all participants, for  
238 example by not mentioning the specific study topic until it was confirmed that the participants  
239 were in a private space. IDIs were conducted in a private unoccupied room at KCMC with a  
240 gender-matched research assistant who had previously formed a relationship with the patient  
241 during the initial survey.

242 Interviews were conducted in Kiswahili using a semi-structured interview guide. The  
243 interview guide included open-ended questions with probes built in for additional questioning  
244 when the subject matter was unclear, of interest, or inconsistent. After an early review of  
245 quantitative and qualitative data, interesting trends around alcohol use, depression, and mental  
246 well-being arose. Thus, the research team amended the interview guide to include the following  
247 questions: “Is there a relationship between depression and alcohol use? If yes, please explain”;  
248 “Is the burden of alcohol use and depression higher among either men or women? Why or why

249 not?” This change was implemented with IRB approval after the 7th IDI was conducted. Aside  
250 from these additions, the same interview guide was used for all participants. Participants were  
251 provided with refreshments halfway through the interview session and received a small stipend  
252 of 5,000 TSH (approximately 2.25 USD) for travel reimbursement.

### 253 *Analysis*

254 Qualitative interviews were analyzed using a grounded theory approach to allow new  
255 themes to arise organically and be fully explored (52). Based on the first four interviews, a  
256 codebook was developed by the primary data analyst and the Tanzanian research team using both  
257 deductive and inductive coding schemes. To ensure cultural pertinence and maintain content  
258 validity, the codebook was consistently discussed and modified to include additional themes  
259 from new interviews.

260 The primary data analyst trained the Tanzanian research team on qualitative analysis and  
261 coding using NVivo 12 software. All team members coded the first three interviews individually  
262 and then discussed them to maintain coding reliability. If disagreements were present in coding  
263 schemes, the team discussed them until a consensus on the code was reached. This process  
264 continued until an 80% agreement was reached among the research team. After the analysis of  
265 the remaining 16 interviews, the analysis team approved the final coding, and content memos  
266 were created for each theme.

### 267 *Research Ethics*

268 Ethical approval for this study was obtained from the Duke University Institutional  
269 Review Board, the Tanzanian National Institute of Medical Research, and the Kilimanjaro  
270 Christian Medical University College Ethical Review Board prior to the onset of any data  
271 collection. Data were shared only through a data share agreement and were maintained in a de-

272 identified manner as much as possible. Personal health information was used for screening and  
273 enrollment but was de-identified when data were stored and analyzed.

## 274 Results

### 275 *Quantitative*

276 This study was composed primarily of female participants, most of whom were Christian  
277 (n = 529, 79.5%), were employed (n = 371, 56.6%), and were living with a partner either in a  
278 registered or unregistered marriage (n = 414, 62.2%) (Table 1). ED men were found to drink the  
279 highest quantities of alcohol, do so the most frequently, and spend the most money on alcohol  
280 each week of all three patient groups. The female RHC patient population had the youngest  
281 average age, which may be due to the fact that the RHC sees a large number of women who are  
282 of childbearing potential.

283 The highest average [SD] PHQ-9 score belonged to ED women (7.22 [5.07]), followed  
284 by RHC women (4.91 [4.11]) and ED Men (3.75 [4.38]) (Table 2). Across all patient  
285 populations, ED women also had the highest prevalence of MDD (31%), followed by RHC  
286 women (17%) and ED men (16%) (Table 2). Differences in average PHQ-9 scores and  
287 prevalence of MDD were statistically significant (P-Value < 0.001) across the three patient  
288 groups (Table 2). More patients from the RHC women (10%) population had sought psychiatric  
289 treatment than ED women (8.9%) and ED men (7.1%), but this difference was not statistically  
290 significant (P-Value = 0.895).

291 Female patients exhibited a statistically significant (p <0.001) increased risk of MDD  
292 status, with a relative risk of 1.15 (95% CI: 1.07 - 1.23) (Table 3). This corresponds to a 15%  
293 increased risk of having MDD as compared to their male counterparts. In particular, women  
294 attending the ED (e.g., ED women) demonstrated a 71% increased risk of MDD compared to  
295 other clinical groups, with a relative risk of 1.71 (95% CI 1.43 - 2.06). In contrast, RHC Women  
296 and ED Men exhibited a significantly reduced risk of MDD by 33% (RR: 0.67, 95% CI: 0.49 -

297 0.92) and 58% (RR: 0.42, 95% CI: 0.22 - 0.79), respectively. Significant increases, or decreases,  
298 in the relative risk of MDD were not observed among individuals with HHD status or among  
299 those who sought psychiatric treatment ( $p > 0.1$ ).

300 Finally, in looking at the relationship between alcohol consumption and depressive  
301 symptoms, AUDIT and PHQ-9 scores were found to be linearly associated *only* among ED men  
302 ( $R^2 = 0.11$ ;  $p < 0.001$ ) (Figure 1). No significant linear association was found between depression  
303 and alcohol use among ED women ( $R^2 = 0$ ;  $p < 0.668$ ) nor RHC women ( $R^2 = 0.02$ ;  $p < 0.014$ ).



304

**Table 1: Patient Demographics**

| Demographics by Population Type            | Overall, N = 655 <sup>1</sup> | ED Women, N = 271 <sup>1</sup> | RHC Women, N = 270 <sup>1</sup> | ED Men, N = 114 <sup>1</sup> | P-Value |
|--------------------------------------------|-------------------------------|--------------------------------|---------------------------------|------------------------------|---------|
| <b>Age</b>                                 | 42.2 (18.8)                   | 46.2 (22.8)                    | 36.4 (12.8)                     | 46.3 (17.0)                  | <0.001  |
| <b>Religion</b>                            |                               |                                |                                 |                              |         |
| None                                       | 11 (1.7%)                     | 5 (1.8%)                       | 3 (1.1%)                        | 3 (2.5%)                     | 0.205   |
| Muslim                                     | 124 (18.6%)                   | 47 (17.3%)                     | 45 (16.5%)                      | 32 (26.2%)                   |         |
| Christian                                  | 529 (79.5%)                   | 218 (80.4%)                    | 224 (82.4%)                     | 87 (71.3%)                   |         |
| Other                                      | 1 (0.2%)                      | 1 (0.4%)                       | 0 (0.0%)                        | 0 (0.0%)                     |         |
| Missing/Refused                            |                               |                                |                                 |                              |         |
| <b>Marital Status</b>                      |                               |                                |                                 |                              |         |
| Living w/ partner in registered marriage   | 336 (50.5%)                   | 130 (48.0%)                    | 140 (51.5%)                     | 66 (54.1%)                   | <0.01   |
| Living w/ partner in unregistered marriage | 78 (11.7%)                    | 25 (9.2%)                      | 41 (15.1%)                      | 12 (9.8%)                    |         |
| Divorced/Separated                         | 32 (4.8%)                     | 16 (5.9%)                      | 7 (2.6%)                        | 9 (7.4%)                     |         |
| Widowed                                    | 80 (12.0%)                    | 45 (16.6%)                     | 27 (9.9%)                       | 8 (6.6%)                     |         |
| Never Married                              | 137 (20.6%)                   | 55 (20.3%)                     | 57 (21.0%)                      | 25 (20.5%)                   |         |
| Missing/Refused                            |                               |                                |                                 |                              |         |
| <b>Employment Status</b>                   |                               |                                |                                 |                              |         |
| Employed                                   | 371 (56.6%)                   | 127 (46.9%)                    | 192 (71.1%)                     | 52 (45.6%)                   | <0.001  |
| Unemployed                                 | 215 (32.8%)                   | 111 (41.0%)                    | 50 (18.5%)                      | 54 (47.4%)                   |         |
| Student                                    | 69 (10.5%)                    | 33 (12.2%)                     | 28 (10.4%)                      | 8 (7.0%)                     |         |

<sup>1</sup>n / N (%); Mean (SD)

305

306

**Table 2: Study Population PHQ-9 and AUDIT Scores**

| PHQ-9 and AUDIT Status by Population Type | Overall, N = 655 <sup>1</sup> | ED Women, N = 271 <sup>1</sup> | RHC Women, N = 270 <sup>1</sup> | ED Men, N = 114 <sup>1</sup> | P-Value |
|-------------------------------------------|-------------------------------|--------------------------------|---------------------------------|------------------------------|---------|
| <b>PHQ-9 Score</b>                        | 5.66 (4.77)                   | 7.22 (5.07)                    | 4.91 (4.11)                     | 3.75 (4.38)                  | <0.001  |
| <b>MDD Status (PHQ-9 ≥ 9)</b>             | 106 (16%)                     | 84 (31%)                       | 45 (17%)                        | 18 (16%)                     | <0.001  |
| <b>AUDIT Score</b>                        | 3.22 (5.36)                   | 3.07 (4.76)                    | 1.86 (3.46)                     | 6.76 (8.16)                  | <0.001  |
| <b>HHD Status (AUDIT ≥ 8)</b>             | 109 (17%)                     | 46 (25%)                       | 20 (7.4%)                       | 43 (38%)                     | <0.001  |
| <b>Sought Psychiatric Treatment</b>       |                               |                                |                                 |                              | 0.895   |
| No                                        | 592 (91%)                     | 245 (91%)                      | 242 (90%)                       | 105 (93%)                    |         |
| Yes                                       | 59 (9.0%)                     | 24 (8.9%)                      | 27 (10%)                        | 8 (7.1%)                     |         |
| Missing/Refused                           | 4 / 655                       | 2 / 271                        | 1 / 270                         | 1 / 114                      |         |

<sup>1</sup>n / N (%); Mean (SD)

307

308

**Table 3: Univariate Relative Risks for Predictors of MDD Status**

| Binary Predictors of MDD Status               | Relative Risk (RR)<br>(95% CI) | P Value |
|-----------------------------------------------|--------------------------------|---------|
| <b>Female Gender</b>                          | 1.10 (1.02 - 1.18)             | <0.05   |
| <b>Clinical Group</b>                         |                                |         |
| <b>ED Women</b>                               | 1.58 (1.32 - 1.90)             | <0.001  |
| <b>RHC Women</b>                              | 0.70 (0.54 - 0.91)             | <0.01   |
| <b>ED Men</b>                                 | 0.61 (0.38 - 0.97)             | <0.05   |
| <b>HHD Status (AUDIT <math>\geq</math> 8)</b> | 1.07 (0.72 - 1.58)             | 0.738   |
| <b>Sought Psychiatric Treatment</b>           | 0.968 (0.91 - 1.03)            | 0.428   |

Unadjusted univariate associations between predictors of MDD and MDD, reported as RR (95% CI).

309

**Figure 1: Linear Regression between PHQ-9 and AUDIT Scores across Patient Populations**

311 *Qualitative*

312 Nineteen patients (ED women, n = 5; RHC women, n = 5; ED men, n = 9) between the  
313 ages of 20 and 70 years participated in an IDI. While the majority were Christian (n = 15, 80%),  
314 education levels, relationship status, and alcohol use among IDI participants varied widely. Some  
315 participants held only primary-level education, while others held an advanced degree, were  
316 single, married, or divorced, and some never consumed alcohol while others had 3 to 4 drinks  
317 per sitting almost every day of the week.

318 Two overarching themes were deductively identified from the 19 completed IDIs: (1) the  
319 relationship between alcohol use and mental well-being and (2) gender imbalances in the effect  
320 of alcohol use on mental well-being (Table 4). Within the first theme, participants noted that  
321 alcohol consumption drove financial stress among men while also being used as a coping  
322 mechanism for stress. In the second theme, IDI participants noted a distinction in the strength of  
323 men versus women’s social support networks used to deal with stressful situations. The relative  
324 lack of support for men impacted their alcohol consumption behaviors and negatively influenced  
325 their overall mental health.

326 **Table 4: Qualitative Themes and Sub-Themes**

| Themes                                                         | Sub-Themes                                     |
|----------------------------------------------------------------|------------------------------------------------|
| Relationship between alcohol use and mental well-being         | Alcohol use and financial stress               |
|                                                                | Alcohol use as a coping mechanism for stress   |
| Gender imbalances in alcohol use’s effect on mental well-being | Lack of healthy outlets for stress among men   |
|                                                                | Women’s social networks as a protective factor |

327

328 **Relationship Between Alcohol Use and Mental Well-Being**

329

330 Alcohol use as a contributor to financial stress

331 Respondents reported that alcohol consumption exacerbated life stressors, mentioning an  
332 increase in monetary stress among both genders, but especially in men. Exemplifying this, one  
333 respondent highlighted the financial stress created in his own life by his overconsumption of  
334 alcohol and how it affected his mental state and his family's financial opportunities.

335 *"I was drinking too much. We used to start drinking from 5pm in the evening until 1am at*  
336 *night! And you spend more than 200,000-300,000 shillings per night, and the wife does*  
337 *not know! So, we used to drink strong spirits like Konyagi, 3-4 big bottles per night.*  
338 *Thus, that time of my life was so boring and miserable. That habit put me under stress*  
339 *and depression for about a year. My life got back to zero. I couldn't afford even paying*  
340 *school fees for my kids."* (30 to 39-year-old man, PHQ-9 = 7)

341 From this time spent drinking, he concluded that "*alcohol never reduced stress.*" Rather, because  
342 of his drinking, his "*stress was even worse*". Another respondent described how men "*spend all*  
343 *the money*" on consuming alcohol "*and come back home with nothing*" (50 to 59-year-old man,  
344 PHQ-9 = 1), causing financial distress. A female participant shared:

345 *"There was a day I was stressed and I decided to go out for drinking and I ended up*  
346 *spending too much money, more than what I planned to spend. The next morning, I*  
347 *regretted everything a lot and I blamed alcohol."* (20 to 29-year-old woman, PHQ-9 =  
348 15)

349 Not only did alcohol consumption lead to financial stress, but reciprocally, interviewees  
350 alluded to financial stress driving increased alcohol consumption. The anxiety that arose when

351 men were unable to fulfill their perceived role as financial providers drove men to drink to lower  
352 their distress.

353 *“You may find a man working but not gaining enough to provide well for himself and his*  
354 *family, so he becomes so stressed as he is not respected as a provider. As a result, he*  
355 *falls into alcohol drinking in order to get rid of his problems.”* (30 to 39-year-old  
356 woman, PHQ-9 = 5)

357 Alcohol use as a coping mechanism for stress:

358 The cyclical pattern between alcohol consumption and financial stressors was mimicked  
359 throughout other interviews and illuminated the use of alcohol as a coping mechanism for stress.  
360 Participants widely suggested that alcohol is used to mitigate their own general stress or “*life*  
361 *hardship*” (20 to 29-year-old man, PHQ-9 = 0) within their community when proper treatment  
362 was unavailable.

363 *“Many people who drink alcohol excessively use alcohol as a coping mechanism to*  
364 *handle or reduce stress and life difficulties such as losing a loved one or family*  
365 *problems.”* (30 to 39-year-old woman, PHQ-9 = 13)

366 Another participant provided a personal experience of harmful alcohol use to cope with loss  
367 within their own family:

368 *“There was a time when my mom started unhealthy drinking after my dad passed away.*  
369 *She started that as a coping mechanism of losing my dad. It took her six months of*  
370 *unhealthy drinking. She was complaining about missing him so much and she was*  
371 *drinking a lot to the point where we had to carry her.”* (20 to 29-year-old woman, PHQ-9  
372 = 15)

373           However, reliance on alcohol to reduce stress only instigated a repetitive chain of  
374 deleterious behaviors. Utilizing alcohol to relieve stress was described by one participant as  
375 “pouring water in a jar that is leaking” (20 to 29-year-old man, PHQ-9 = 0). In other words,  
376 alcohol provided short-term relief, but lacked any long-term benefit to psychological well-being  
377 or sustainable solutions to mental distress.

378           The negative impacts that resulted from the use of alcohol as a coping mechanism were  
379 explored by another participant, who shared:

380           *“When people face troubles they drink too much... [They] mistakenly use alcohol as a*  
381 *way to solve their problems. After becoming sober again they realize that the problems*  
382 *are still there. They get even more depressed because they have lost both time and*  
383 *resources on a wrong thing and find themselves drinking even more than before. The*  
384 *cycle goes on and on.”* (30 to 39-year-old woman, PHQ-9 = 5)

385 Overall, most participants had well-defined ideas regarding alcohol use as a coping mechanism  
386 for stress, life challenges, and depression, as well as the negative, cyclic impacts resulting from  
387 excessive use within their community.

### 388 **Gender Imbalances in the Effect of Alcohol Use on Mental Well-Being**

389           The second central theme identified in IDIs was the gendered differences in how alcohol  
390 use impacts mental well-being and vice versa, with almost all participants agreeing that the  
391 effects were more severe among men.

392           *“Most men are affected more than women, because in my community men have a lot of*  
393 *responsibilities as compared to women. So, by the time he can’t meet his goals, he ends*  
394 *up being frustrated and resorts to abusing alcohol and depression occurs.”* (20 to 29-  
395 year-old man, PHQ-9 = 0)

396 While not necessarily normative, the lack of healthy outlets for men, strong social networks for  
397 women, and the unhealthy expectations of traditional male and female roles were all factors  
398 found to influence the relationship between alcohol consumption and mental well-being that  
399 disproportionately burdened men. Thus, highlighting the gender inequity in Tanzanian culture  
400 that is influencing alcohol consumption and mental well-being.

401 Lack of healthy outlets for men encourages alcohol intake

402 Throughout the interviews, many respondents highlighted a lack of healthy emotional  
403 outlets for men to deal with stressors or discuss their challenges – as said by one, “*a man never*  
404 *cries*” (20 to 29-year-old woman, PHQ-9 = 4), meaning that it was looked down upon socially  
405 for a man to express his emotions. This drove men to cope with stressful life situations and  
406 depression through alcohol:

407 “*Men only show a happy face even when they are stressed, because it is not easy for a*  
408 *man to talk about his problems. Many men drink alcohol to relieve their pain. I think a*  
409 *lot of men feel that showing their feelings of pain is a weakness, and that he will look like*  
410 *a weak man.*” (30 to 39-year-old woman, PHQ-9 = 13)

411  
412 “*This problem affects more men than women in my society...They are always taught to*  
413 *keep the problems to themselves as a sign of strength or manhood. That’s why, when*  
414 *problems overwhelm them, they get into depression. They can’t tell anyone so they get*  
415 *into drinks and drink alone.*” (20 to 29-year-old woman, PHQ-9 = 4)

416 The phrase “a man never cries” and the social significance of being labeled a weak man,  
417 according to another respondent, created more mental distress and depression among men  
418 compared to women. This burden was noted to be lesser on women because they were socially



419 allowed to express feelings of weakness and hardship. One participant labeled these cultural  
420 views of masculinity as “toxic”, and called for broader societal changes, such as creating new  
421 norms for men to be more open and honest about their challenges.

422 *“You know, naturally men are meant to be strong. Sometimes men experience problems*  
423 *but you will never see them sharing to a fellow man, you know why? That’s a sign of*  
424 *weakness. And this is the toxic feelings that we as men create every day, contrary to*  
425 *women who like to share anything they are going through. Through sharing you are*  
426 *releasing all the pains and sorrow and bad feelings... so the heart feels fresh and strong!*  
427 *I think this is the main reason why men get depressed compared to women.” (50 to 59-*  
428 *year-old man, PHQ-9 = 1)*

429 It was not a lack of desire, but rather a sociocultural norm that meant men were unable to share  
430 emotionally with other men. One respondent expressed his desire to talk about personal troubles,  
431 but found he is only able to do so when he and his friends are intoxicated and there is little  
432 chance of the event being remembered:

433 *“When I am stressed and I go out with my friends and we are drunk, I will open up all my*  
434 *problems because I am sure the next day they will not remember what I shared with them.*  
435 *I see it’s a good way to let everything out as I am sure the next day everything will be*  
436 *forgotten.” (20 to 29-year-old man, PHQ-9 = 15)*

437 The desire to share his hardships only when his social network will forget further illuminates the  
438 overall lack of socially acceptable healthy outlets for men to discuss their mental well-being.

#### 439 Women’s social networks:

440 In stark contrast to men's inability to share with other men, robust social networks among many  
441 women in Moshi were seen as a protective factor in combating stress – *“I think men are more*

442 *stressed and they hide their stress on alcohol use. Women, when they are stressed, talk a lot and*  
443 *that helps them to reduce stress”* (20 to 21-year-old woman, PHQ-9 = 15). It was seen as easy  
444 and commonplace for women to talk with one another, and alcohol was not needed to facilitate  
445 these kinds of conversations – *“A woman may drink one beer and start to open up all her*  
446 *problems, while it takes a man to drink even ten beers and he still may not open up about his*  
447 *problems”* (20 to 29-year-old woman, PHQ-9 = 15). These social networks among women were  
448 so strong that women who were strangers still came to each other for help.

449 *“When women have a problem, they talk about it. That helps to take their pain away. A*  
450 *woman can meet anyone, even if she doesn't know her, and talk to her to relieve her*  
451 *heartache. This helps many women to cope with stress.”* (30 to 39-year-old woman,  
452 PHQ-9 = 13)

453 In summary, participants proposed that depression and harmful alcohol consumption are  
454 strongly influenced by cultural norms. One primary effect of local norms is reduced autonomy  
455 and financial disenfranchisement among women, which in turn influence their rates of  
456 depression and alcohol use. Another primary effect is the increased pressure placed on men to be  
457 the financial caretakers for their families. Social norms mediate that in the face of this stress,  
458 men are expected to *“keep problems to themselves as a sign of strength”* and *“find solutions all*  
459 *by yourself,”* while women in the community are encouraged to talk to other women and find it  
460 easy to find *“a listening ear”* (20 to 29-year-old woman, PHQ-9 = 4). In effect, women are  
461 shown to employ healthier coping strategies while men utilize unhealthy coping strategies in the  
462 form of alcohol use.

## 463 Discussion

464 This study, which is among the first of its kind in Northern Tanzania, investigated the  
465 intersection between gender, alcohol use, and depression among ED and RHC patients at  
466 KCMC. Existing literature within Moshi has identified high levels of alcohol use, described  
467 depression among specific patient populations, and explored gender differences in alcohol  
468 consumption and alcohol-related consequences (26,27,32–36,38,53). Our mixed-methods  
469 analysis builds upon this literature to help inform the design and implementation of more  
470 effective mental health-related treatment options in this region.

471 In our analysis, we found that ED women patients had the highest rates of MDD among  
472 the three populations studied, indicating that this group may be particularly in need of more  
473 concerted clinical mental health care efforts. Importantly, though, an increasing severity of  
474 depressive symptoms in women did not correlate with increased alcohol use. This observation  
475 stands in direct contrast to what was observed among ED men, namely a positive correlation  
476 between AUD and depressive symptoms. This relationship is supported by our qualitative data,  
477 which demonstrate that men in Moshi, but not women, lacked social outlets for dealing with  
478 stress, making them more likely to turn to alcohol as a coping mechanism. It appears that social  
479 norms disenfranchise women by limiting their autonomy and financial opportunities, which may  
480 contribute to higher rates of depression among women. Men, by contrast, face cultural norms of  
481 being the main financial provider, which contributes to increased stress. However, in the face of  
482 these differing stressors, women employ healthier social coping strategies while men are more  
483 likely to remain silent and use alcohol to cope. These findings illustrate the need to take both a  
484 cultural and gender lens to mental health treatment in Moshi, utilizing social networks and  
485 differentiating interventions by gender to optimize treatment and health outcomes. Interventions

486 might also seek to examine whether social norms and gendered coping strategies reflect  
487 underlying values and goals, or should be reconsidered to better align with these values. For  
488 example, previous work based in Kenya has shown the downstream benefits for family and  
489 community members when interventions that address both alcohol use and depression are  
490 implemented (54–56).

491 Our results indicate that ED women have the highest rates of MDD among all  
492 populations, highlighting the need for mental health interventions to better support this high-risk  
493 group. This reflects global differences in the prevalence of depression among men and women,  
494 with depression being 50% more common in women compared to men (57). Paralleling our  
495 estimates, in a systematic review of 134 studies, Corcoran et al. found the prevalence of  
496 depression among women in LMICs was almost twice as high among women living in higher-  
497 income countries (58). Within our qualitative data, many interviewees described depressive  
498 symptoms without ever stating or naming depression specifically. The hesitancy to label  
499 themselves or others as depressed could highlight the mental health stigma that is present in  
500 Tanzania and globally (59,60).

501 Although our results demonstrate higher rates of depression among women, depression  
502 was not associated with increased alcohol use among women. Interestingly, though, this was not  
503 true for male participants, where depressive symptoms were positively and linearly associated  
504 with alcohol consumption. This dichotomy suggests that men's and women's approaches to  
505 alcohol use and stress relief differ significantly. Stress has been widely associated with alcohol  
506 use, with previous research conducted by our team identifying stress as a major motivator for  
507 unhealthy drinking habits in Moshi (32). A major underlying factor in the gendered differences  
508 between stress and alcohol use is the influence of social networks. Our qualitative findings

509 suggest a higher prevalence of strong social support networks for women, which may be  
510 associated with low rates of alcohol use and harmful drinking behaviors. This link is also seen in  
511 global data, where social support networks have been seen to offer a protective effect on  
512 depression risk (61).

513 As was noted within our IDIs, the relative absence of emotional support for men may  
514 lead them to use alcohol as a coping mechanism for difficult events and thus calls for an increase  
515 in healthy emotional outlets for men. While social support networks may be helpful for women  
516 experiencing emotional distress, it is still important to acknowledge the larger clinical burden of  
517 depression experienced by women in future mental health interventions within this setting.  
518 Particularly, previous research has examined the disproportionate stigma experienced by women  
519 who consume alcohol in Tanzania (62). A study recently conducted in South Africa suggests  
520 that increasing social support may not be enough to prevent depression among women who are  
521 experiencing high rates of stigma (63); therefore, it may be necessary to incorporate additional  
522 targeting counseling and advocacy focused on addressing harmful cultural norms and gender  
523 inequities that contribute to the greater risk of depression among Tanzanian women. Future  
524 mental health-related interventions in this region must be cognizant of cultural norms and  
525 resulting behavioral differences underlying mental health disorders to more efficiently and  
526 effectively distribute available resources.

527 The findings discussed thus far highlight the need for gender and sociocultural factors to  
528 be more closely considered in mental health-related programs and, more specifically, for there to  
529 be greater differentiation in interventions intended for men versus women. For women, the high  
530 prevalence of MDD identified in this paper, especially among those receiving care at the ED,  
531 points to a need for more robust mental health-related screening, referral, and care services for

532 female patients. Previous work by our team has highlighted the relevance of expanding these  
533 services within KCMC's ED (64), but in the context of this paper, it is especially important to  
534 note the potential benefit that this could have among women, given their significant mental  
535 health burden.

536 In contrast, for men, the linear relationship between alcohol use and depressive symptoms  
537 in this analysis indicates that local alcohol-related interventions may benefit from teaching and  
538 providing healthy, values-based coping mechanisms when faced with life stressors. Mental  
539 health-related treatments that are differentiated by gender have been shown to have greater  
540 effectiveness(65–67) and individualized treatments for men may have wider cultural acceptance.

541 Previous research and clinical trials have also shown the value of incorporating a multi-  
542 level approach to mental health and substance use treatment, addressing individual-, family-, and  
543 community-level interventions. Mathias et al. found that incorporating multi-pronged elements to  
544 care delivery, including increased access to services, greater education around mental health  
545 topics, and robust social support networks, was effective in treating patients with severe mental  
546 health problems in India (68). In Tanzania specifically, multi-level approaches to mental health  
547 care are gaining support (69) and have been locally implemented in the treatment of other  
548 medical issues like HIV (70). As such, we recommend that local health policy efforts incorporate  
549 these considerations in mental health delivery efforts to provide more effective care for the  
550 Moshi community.

### 551 *Strengths and Limitations*

552 Though this paper offers novel insights into the mental health landscape of Moshi, the  
553 data presented here must be considered along with some broader limitations. In terms of  
554 qualitative data, specific interview questions on depression and alcohol use were only added

555 midway through data collection, once the research team recognized the importance of this topic  
556 in preliminary analyses. While added later on, saturation on the topic of depression and alcohol  
557 use was still reached, and was done so using robust qualitative data collection procedures,  
558 including gender matching of interviewers and interviewees, rigorous qualitative training among  
559 the research team, and ensured privacy and confidentiality. Therefore, we hold that the IDI data  
560 presented here is representative and accurate for the study population.

561 In addition, some key drivers of MDD such as past trauma, medical conditions, and  
562 genetic factors were not measured in the quantitative survey. Information like this could help  
563 identify factors within the broader population that should be addressed in community outreach  
564 programs. Therefore, we encourage future research to explore the reasons underlying depressive  
565 symptoms in this region, especially in the ED women population that was identified as high-risk.  
566 Even in light of these limitations, this study adds meaningfully to the existing literature, standing  
567 as the first study to specifically explore the intersection of alcohol use, depression, and gender  
568 within Moshi and can serve as a foundation for future related research.

## 569 Conclusion

570 Women in Tanzania are more likely to experience major depressive disorder. Depression  
571 was not associated with higher alcohol use among women but was significantly associated with  
572 increased alcohol use among men. Women experiencing depression were more likely to rely on  
573 healthy coping through emotional support networks, whereas these networks were weaker for  
574 men, which may contribute to men using unhealthy strategies such as drinking alcohol when  
575 experiencing emotional distress. Our findings highlight the need for future mental health-related  
576 interventions in this region to address harmful gender norms, to take gender into greater account

577 in the design of interventions, and to include multiple aspects of care delivery designed to  
578 address individual, family, and community aspects of overall patient well-being.



## 579 Bibliography

- 580 1. GBD 2016 Alcohol Collaborators. Alcohol use and burden for 195 countries and  
581 territories, 1990-2016: a systematic analysis for the Global Burden of Disease Study 2016.  
582 *Lancet*. 2018 Sep 22;392(10152):1015–35.
- 583 2. GBD 2019 Risk Factors Collaborators. Global burden of 87 risk factors in 204 countries  
584 and territories, 1990-2019: a systematic analysis for the Global Burden of Disease Study  
585 2019. *Lancet*. 2020 Oct 17;396(10258):1223–49.
- 586 3. Rehm J, Gmel GE, Gmel G, Hasan OSM, Imtiaz S, Popova S, et al. The relationship  
587 between different dimensions of alcohol use and the burden of disease-an update.  
588 *Addiction*. 2017 Jun;112(6):968–1001.
- 589 4. GBD 2013 Risk Factors Collaborators, Forouzanfar MH, Alexander L, Anderson HR,  
590 Bachman VF, Biryukov S, et al. Global, regional, and national comparative risk  
591 assessment of 79 behavioural, environmental and occupational, and metabolic risks or  
592 clusters of risks in 188 countries, 1990-2013: a systematic analysis for the Global Burden  
593 of Disease Study 2013. *Lancet*. 2015 Dec 5;386(10010):2287–323.
- 594 5. Rehm J. The risks associated with alcohol use and alcoholism. *Alcohol Res Health*.  
595 2011;34(2):135–43.
- 596 6. Grant BF, Goldstein RB, Saha TD, Chou SP, Jung J, Zhang H, et al. Epidemiology of  
597 DSM-5 Alcohol Use Disorder: Results From the National Epidemiologic Survey on  
598 Alcohol and Related Conditions III. *JAMA Psychiatry*. 2015 Aug;72(8):757–66.
- 599 7. Boden JM, Fergusson DM. Alcohol and depression. *Addiction*. 2011 May;106(5):906–14.
- 600 8. McHugh RK, Weiss RD. Alcohol use disorder and depressive disorders. *Alcohol Res*.  
601 2019 Oct 21;40(1).
- 602 9. Kuria MW, Ndeti DM, Obot IS, Khasakhala LI, Bagaka BM, Mbugua MN, et al. The  
603 Association between Alcohol Dependence and Depression before and after Treatment for  
604 Alcohol Dependence. *ISRN Psychiatry*. 2012 Jan 26;2012:482802.
- 605 10. Archibald L, Brunette MF, Wallin DJ, Green AI. Alcohol use disorder and schizophrenia  
606 or schizoaffective disorder. *Alcohol Res*. 2019 Dec 20;40(1).
- 607 11. Castillo-Carniglia A, Keyes KM, Hasin DS, Cerdá M. Psychiatric comorbidities in alcohol  
608 use disorder. *Lancet Psychiatry*. 2019 Dec;6(12):1068–80.
- 609 12. Lasserre AM, Imtiaz S, Roerecke M, Heilig M, Probst C, Rehm J. Socioeconomic status,  
610 alcohol use disorders, and depression: A population-based study. *J Affect Disord*. 2022  
611 Mar 15;301:331–6.
- 612 13. Grant BF, Stinson FS, Dawson DA, Chou SP, Dufour MC, Compton W, et al. Prevalence  
613 and co-occurrence of substance use disorders and independent mood and anxiety

- 614 disorders: results from the National Epidemiologic Survey on Alcohol and Related  
615 Conditions. *Arch Gen Psychiatry*. 2004 Aug;61(8):807–16.
- 616 14. Hasin D, Liu X, Nunes E, McCloud S, Samet S, Endicott J. Effects of major depression on  
617 remission and relapse of substance dependence. *Arch Gen Psychiatry*. 2002  
618 Apr;59(4):375–80.
- 619 15. Greenfield SF, Weiss RD, Muenz LR, Vagge LM, Kelly JF, Bello LR, et al. The effect of  
620 depression on return to drinking: a prospective study. *Arch Gen Psychiatry*. 1998  
621 Mar;55(3):259–65.
- 622 16. Friedrich MJ. Depression is the leading cause of disability around the world. *JAMA*. 2017  
623 Apr 18;317(15):1517.
- 624 17. Knettel BA, Knippler E, Martinez A, Sardana S, Agor D, Mwobobia J, et al. A scoping  
625 review of counseling interventions for suicide prevention in Africa: Few studies address  
626 this life-saving aspect of mental health treatment. *J Affect Disord*. 2023 May 1;328:183–  
627 90.
- 628 18. Jack H, Stein A, Newton CR, Hofman KJ. Expanding access to mental health care: a  
629 missing ingredient. *Lancet Glob Health*. 2014 Apr;2(4):e183-4.
- 630 19. Rathod S, Pinninti N, Irfan M, Gorczynski P, Rathod P, Gega L, et al. Mental Health  
631 Service Provision in Low- and Middle-Income Countries. *Health Serv Insights*. 2017 Mar  
632 28;10:1178632917694350.
- 633 20. Lund C, Breen A, Flisher AJ, Kakuma R, Corrigall J, Joska JA, et al. Poverty and  
634 common mental disorders in low and middle income countries: A systematic review. *Soc  
635 Sci Med*. 2010 Aug;71(3):517–28.
- 636 21. Teferra S, Medhin G, Selamu M, Bhana A, Hanlon C, Fekadu A. Hazardous alcohol use  
637 and associated factors in a rural Ethiopian district: a cross-sectional community survey.  
638 *BMC Public Health*. 2016 Mar 3;16:218.
- 639 22. Nadkarni A, Bhatia U, Bedendo A, de Paula TCS, de Andrade Tostes JG, Segura-Garcia  
640 L, et al. Brief interventions for alcohol use disorders in low- and middle-income countries:  
641 barriers and potential solutions. *Int J Ment Health Syst*. 2022 Aug 8;16(1):36.
- 642 23. Mental Health Atlas 2020 - United Republic of Tanzania. WHO [Internet]. 2020 [cited  
643 2023 Oct 21]; Available from: [https://www.who.int/publications/m/item/mental-health-  
644 atlas-tza-2020-country-profile](https://www.who.int/publications/m/item/mental-health-atlas-tza-2020-country-profile)
- 645 24. WHO. Global status report on alcohol and health 2018. World Health Organization. 2018;
- 646 25. Rehm J, Shield KD. Global burden of alcohol use disorders and alcohol liver disease.  
647 *Biomedicines*. 2019 Dec 13;7(4).
- 648 26. Mitsunaga T, Larsen U. Prevalence of and risk factors associated with alcohol abuse in  
649 Moshi, northern Tanzania. *J Biosoc Sci*. 2008 May;40(3):379–99.

- 650 27. Francis JM, Weiss HA, Mshana G, Baisley K, Grosskurth H, Kapiga SH. The  
651 Epidemiology of Alcohol Use and Alcohol Use Disorders among Young People in  
652 Northern Tanzania. *PLoS ONE*. 2015 Oct 7;10(10):e0140041.
- 653 28. Meier BJ, El-Gabri D, Friedman K, Mvungi M, Mmbaga BT, Nickenig Vissoci JR, et al.  
654 Perceptions of alcohol use among injury patients and their family members in Tanzanian  
655 society. *Alcohol*. 2020 Mar;83:9–15.
- 656 29. Staton CA, Zhao D, Ginalis EE, Hirshon JM, Sakita F, Swahn MH, et al. Alcohol  
657 Availability, Cost, Age of First Drink, and Its Association with At-Risk Alcohol Use in  
658 Moshi, Tanzania. *Alcohol Clin Exp Res*. 2020 Nov 10;44(11):2266–74.
- 659 30. GBD 2019 Diseases and Injuries Collaborators. Global burden of 369 diseases and  
660 injuries in 204 countries and territories, 1990-2019: a systematic analysis for the Global  
661 Burden of Disease Study 2019. *Lancet*. 2020 Oct 17;396(10258):1204–22.
- 662 31. Li S, Xu Y, Zheng L, Pang H, Zhang Q, Lou L, et al. Sex difference in global burden of  
663 major depressive disorder: findings from the global burden of disease study 2019. *Front*  
664 *Psychiatry*. 2022 Feb 21;13:789305.
- 665 32. Pauley A, Buono M, West K, Metcalf M, Rent S, Kilasara J, et al. A Mixed-Methods  
666 Comparison of Gender Differences in Alcohol Consumption and Drinking Characteristics  
667 among Patients in Moshi, Tanzania. *medRxiv*. 2023 May 18;
- 668 33. Griffin SM, Karia FP, Zimmerman A, Minnig MCC, Swahn M, Makelarski J, et al. A  
669 Mixed-Methods Study: Sex Differences in Experiences of Stigma Associated With  
670 Alcoholism and Alcohol Use Disorders Among Injury Patients in Tanzania. *Alcohol Clin*  
671 *Exp Res*. 2020 Aug 9;44(8):1700–7.
- 672 34. Mlaki DA, Asmal L, Paddick S-M, Gray WK, Dotchin C, Walker R. Prevalence and  
673 associated factors of depression among older adults in rural Tanzania. *Int J Geriatr*  
674 *Psychiatry*. 2021 Oct;36(10):1559–66.
- 675 35. Ngocho JS, Minja LM, Mwamba RN, Knettel BA, Kisigo GA, Mmbaga BT, et al.  
676 Prevalence and predictors of depression among women attending antenatal care in Moshi,  
677 Tanzania: a cross-sectional study. *BMC Pregnancy Childbirth*. 2022 Jul 26;22(1):594.
- 678 36. Madundo K, Knettel BA, Knippler E, Mbwambo J. Prevalence, severity, and associated  
679 factors of depression in newly diagnosed people living with HIV in Kilimanjaro,  
680 Tanzania: a cross-sectional study. *BMC Psychiatry*. 2023 Feb 1;23(1):83.
- 681 37. Lugata S, Elinisa M, Doshi B, Kashuta RA, Hango S, Mallosa WJ, et al. Symptoms and  
682 predictors of depression among university students in the Kilimanjaro region of Tanzania:  
683 a cross-sectional study. *J Ment Health*. 2021 Apr;30(2):255–62.
- 684 38. Adams DJ, Ndanzi T, Rweyunga AP, George J, Mhando L, Ngocho JS, et al. Depression  
685 and associated factors among geriatric population in Moshi district council, Northern

- 686 Tanzania. *Aging Ment Health*. 2021 Jun;25(6):1035–41.
- 687 39. Staton CA, Vissoci JRN, Toomey N, Abdelgadir J, Chou P, Haglund M, et al. The impact  
688 of alcohol among injury patients in Moshi, Tanzania: a nested case-crossover study. *BMC*  
689 *Public Health*. 2018 Feb 21;18(1):275.
- 690 40. Ghebremichael M, Paintsil E, Larsen U. Alcohol abuse, sexual risk behaviors, and  
691 sexually transmitted infections in women in Moshi urban district, northern Tanzania. *Sex*  
692 *Transm Dis*. 2009 Feb;36(2):102–7.
- 693 41. Staton CA, Msilanga D, Kiwango G, Vissoci JR, de Andrade L, Lester R, et al. A  
694 prospective registry evaluating the epidemiology and clinical care of traumatic brain  
695 injury patients presenting to a regional referral hospital in Moshi, Tanzania: challenges  
696 and the way forward. *Int J Inj Contr Saf Promot*. 2017 Mar;24(1):69–77.
- 697 42. Smith Fawzi MC, Ngakongwa F, Liu Y, Rutayuga T, Siril H, Somba M, et al. Validating  
698 the Patient Health Questionnaire-9 (PHQ-9) for screening of depression in Tanzania.  
699 *Neurol Psychiatry Brain Res*. 2019 Feb;31:9–14.
- 700 43. Gelaye B, Williams MA, Lemma S, Deyessa N, Bahretibeb Y, Shibre T, et al. Validity of  
701 the Patient Health Questionnaire-9 for depression screening and diagnosis in East Africa.  
702 *Psychiatry Res*. 2013 Dec 15;210(2):653–61.
- 703 44. Sun Y, Fu Z, Bo Q, Mao Z, Ma X, Wang C. The reliability and validity of PHQ-9 in  
704 patients with major depressive disorder in psychiatric hospital. *BMC Psychiatry*. 2020 Sep  
705 29;20(1):474.
- 706 45. Kroenke K, Spitzer RL, Williams JB. The PHQ-9: validity of a brief depression severity  
707 measure. *J Gen Intern Med*. 2001 Sep;16(9):606–13.
- 708 46. American Psychiatric Association. *Diagnostic and Statistical Manual of Mental Disorders*,  
709 5th ed. (DSM-5). 2013.
- 710 47. Nadkarni A, Garber A, Costa S, Wood S, Kumar S, MacKinnon N, et al. Auditing the  
711 AUDIT: A systematic review of cut-off scores for the Alcohol Use Disorders  
712 Identification Test (AUDIT) in low- and middle-income countries. *Drug Alcohol Depend*.  
713 2019 Sep 1;202:123–33.
- 714 48. Bohn MJ, Babor TF, Kranzler HR. The Alcohol Use Disorders Identification Test  
715 (AUDIT): validation of a screening instrument for use in medical settings. *J Stud Alcohol*.  
716 1995 Jul;56(4):423–32.
- 717 49. Vissoci JRN, Hertz J, El-Gabri D, Andrade Do Nascimento JR, Pestillo De Oliveira L,  
718 Mmbaga BT, et al. Cross-Cultural Adaptation and Psychometric Properties of the AUDIT  
719 and CAGE Questionnaires in Tanzanian Swahili for a Traumatic Brain Injury Population.  
720 *Alcohol Alcohol*. 2018 Jan 1;53(1):112–20.
- 721 50. Saunders JB, Aasland OG, Babor TF, de la Fuente JR, Grant M. Development of the

- 722 Alcohol Use Disorders Identification Test (AUDIT): WHO Collaborative Project on Early  
723 Detection of Persons with Harmful Alcohol Consumption--II. *Addiction*. 1993  
724 Jun;88(6):791–804.
- 725 51. Hennink M, Kaiser BN. Sample sizes for saturation in qualitative research: A systematic  
726 review of empirical tests. *Soc Sci Med*. 2022 Jan;292:114523.
- 727 52. McQueen K, Namey E, Guest G. *Applied Thematic Analysis*. 2014, editor. SAGE  
728 Publications Inc; 2014.
- 729 53. Pauley A, Metcalf M, Buono M, West K, Rent S, Nkenguye W, et al. Understanding the  
730 Impacts and Perceptions of Alcohol Use in Northern Tanzania: A Mixed-Methods  
731 Analysis. *medRxiv*. 2023 Sep 13;
- 732 54. Giusto A, Jaguga F, Pereira-Sanchez V, Rono W, Triplett N, Rukh-E-Qamar H, et al.  
733 Barriers and facilitators to father’s engagement in a depression and alcohol use  
734 intervention in kenya: father, family, and community factors. *Int J Environ Res Public*  
735 *Health*. 2023 Mar 9;20(6).
- 736 55. Giusto AM, Ayuku D, Puffer ES. Learn, Engage, Act, Dedicate (LEAD): development  
737 and feasibility testing of a task-shifted intervention to improve alcohol use, depression and  
738 family engagement for fathers. *Int J Ment Health Syst*. 2022 Mar 4;16(1):16.
- 739 56. Giusto A, Mootz JJ, Korir M, Jaguga F, Mellins CA, Wainberg ML, et al. “When my  
740 children see their father is sober, they are happy”: A qualitative exploration of family  
741 system impacts following men’s engagement in an alcohol misuse intervention in peri-  
742 urban Kenya. *SSM Ment Health*. 2021 Dec;1.
- 743 57. WHO. Depressive disorder (depression) [Internet]. World Health Organization. 2023  
744 [cited 2023 Sep 17]. Available from: [https://www.who.int/news-room/fact-](https://www.who.int/news-room/fact-sheets/detail/depression/)  
745 [sheets/detail/depression/](https://www.who.int/news-room/fact-sheets/detail/depression/)
- 746 58. Corcoran J, Marinescu I, Vogelsang C, Kim JC, Morgan S. Prevalence of depression in  
747 women with low income living in developed countries. *Depress Anxiety*. 2021  
748 Oct;38(10):1046–53.
- 749 59. Benedicto M, Mndeme E, Mwakagile D, Mwansisya T. Community Knowledge, Attitudes  
750 and Perception towards Mental Illness in Dodoma Municipality, Tanzania. *ARC J Public*  
751 *Health Community Med*. 2016;1(3).
- 752 60. Wainberg ML, Scorza P, Shultz JM, Helpman L, Mootz JJ, Johnson KA, et al. Challenges  
753 and Opportunities in Global Mental Health: a Research-to-Practice Perspective. *Curr*  
754 *Psychiatry Rep*. 2017 May;19(5):28.
- 755 61. Gariépy G, Honkaniemi H, Quesnel-Vallée A. Social support and protection from  
756 depression: systematic review of current findings in Western countries. *Br J Psychiatry*.  
757 2016 Oct;209(4):284–93.

- 758 62. Pauley A, Metcalf M, Buono M, Rent S, Mikindo M, Sawe Y, et al. " When a man drinks  
759 alcohol it's cool but when a woman drinks she is a hoe ": A Qualitative Exploration of  
760 Alcohol, Gender, Stigma, and Sexual Assault in Moshi, Tanzania. medRxiv. 2023 Aug 28;
- 761 63. Brittain K, Mellins CA, Phillips T, Zerbe A, Abrams EJ, Myer L, et al. Social Support,  
762 Stigma and Antenatal Depression Among HIV-Infected Pregnant Women in South Africa.  
763 AIDS Behav. 2017 Jan;21(1):274–82.
- 764 64. Pauley A, Thatcher EC, Sarafian JT, Zadey S, Shayo F, Mmbaga BT, et al. Alcohol Use  
765 among Emergency Medicine Department Patients in Tanzania: A Comparative Analysis  
766 of Injury Versus Non-Injury Patients. medRxiv. 2023 May 4;
- 767 65. Wechsberg WM, van der Drift I, Howard BN, Myers B, Browne FA, Bonner CP, et al.  
768 Gender and context matter: behavioral and structural interventions for people who use  
769 alcohol and other drugs in africa. Int J Environ Res Public Health. 2022 Jul 16;19(14).
- 770 66. Grella CE. From generic to gender-responsive treatment: changes in social policies,  
771 treatment services, and outcomes of women in substance abuse treatment. J Psychoactive  
772 Drugs. 2008 Nov;Suppl 5:327–43.
- 773 67. Greenfield SF, Grella CE. What is “women-focused” treatment for substance use  
774 disorders? Psychiatr Serv. 2009 Jul;60(7):880–2.
- 775 68. Mathias K, Corcoran D, Pillai P, Deshpande S, San Sebastian M. The Effectiveness of a  
776 Multi-Pronged Psycho-Social Intervention Among People With Mental Health and  
777 Epilepsy Problems - A Pre-Post Prospective Cohort Study Set in North India. Int J Health  
778 Policy Manag. 2021 Sep 1;10(9):546–53.
- 779 69. Akiba CF, Go V, Mwapasa V, Hosseinipour M, Gaynes BN, Amberbir A, et al. The Sub-  
780 Saharan Africa Regional Partnership (SHARP) for Mental Health Capacity Building: a  
781 program protocol for building implementation science and mental health research and  
782 policymaking capacity in Malawi and Tanzania. Int J Ment Health Syst. 2019 Nov  
783 9;13:70.
- 784 70. McCoy SI, Fahey C, Rao A, Kapologwe N, Njau PF, Bautista-Arredondo S. Pilot study of  
785 a multi-pronged intervention using social norms and priming to improve adherence to  
786 antiretroviral therapy and retention in care among adults living with HIV in Tanzania.  
787 PLoS ONE. 2017 May 9;12(5):e0177394.

788 Supporting Information

- 789 1. S1 File
- 790 2. S2 File
- 791 3. S3 File
- 792 4. S4 File
- 793 5. S1 Checklist
- 794 6. S2 Checklist
- 795 7. S1 Questionnaire

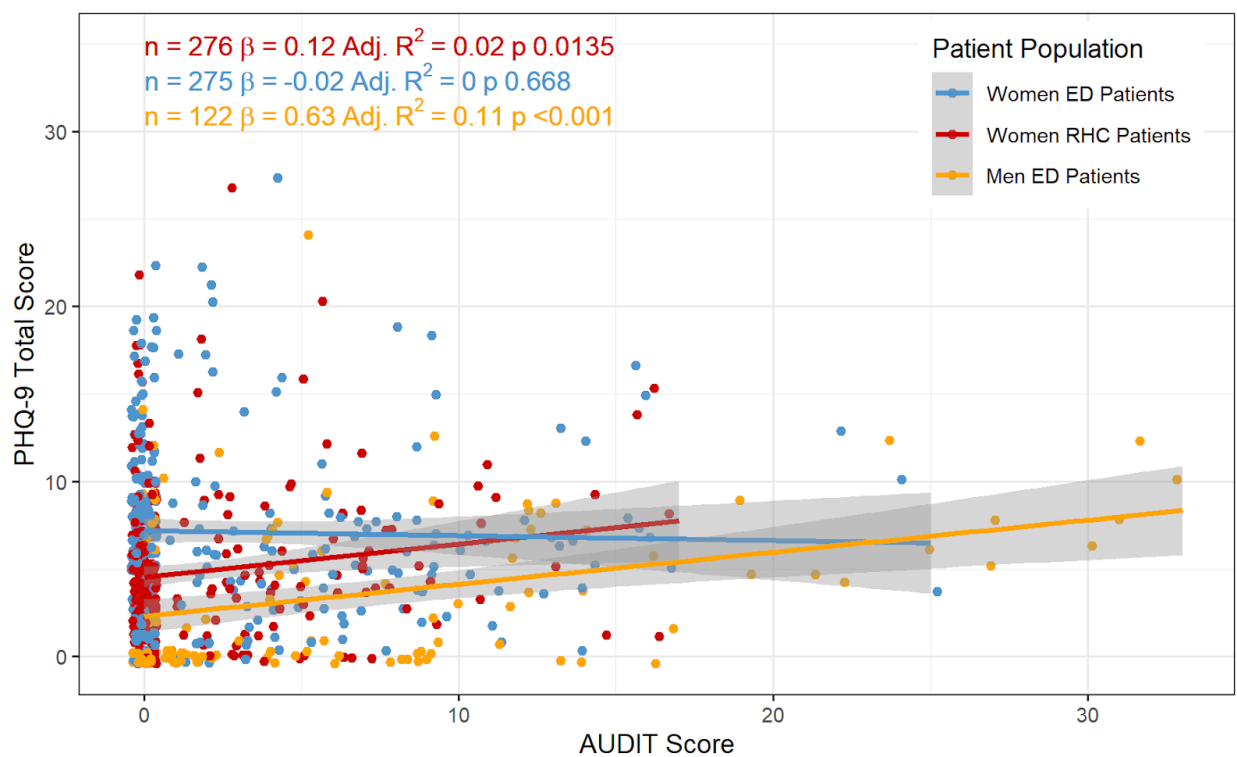

Source: https://medrxiv.org/content/10.1101/2023.11.14.23298216.full.pdf
